# Supplementary material
Source: PubMed Central journal article supplement (PMC5512216)
Supplement: JB.00253-17_zjb015174479s1.pdf [file JB.00253-17_zjb015174479s1.pdf]

# Transcriptional control of the lateral-flagellar genes of *Bradyrhizobium diazoefficiens*

Elías J. Mongiardini, J. Ignacio Quelas, Carolina Dardis, M. Julia Althabegoiti, Aníbal R.

Lodeiro\*

Instituto de Biotecnología y Biología Molecular (IBBM). Facultad de Ciencias Exactas,  
Universidad Nacional de La Plata y CCT-La Plata, CONICET  
Calles 47 y 115 (1900) La Plata, Argentina

\*Corresponding author. [lodeiro@biol.unlp.edu.ar](mailto:lodeiro@biol.unlp.edu.ar)

## Supplemental Material

**Table S1.** Strains and plasmids used in this study.

| Strain or plasmid                     | Relevant characteristics                                                                            | Source                       |
|---------------------------------------|-----------------------------------------------------------------------------------------------------|------------------------------|
| <i>B. diazoefficiens</i>              |                                                                                                     |                              |
| USDA 110                              | Wild-type, Cm <sup>r</sup>                                                                          | ARS-USDA, Beltsville (MD)    |
| LP 3004                               | USDA 110 spontaneous derivative, Cm <sup>r</sup> , Sm <sup>r</sup>                                  | (1)                          |
| LP 3008                               | LP 3004 spontaneous derivative, higher motility, Cm <sup>r</sup> , Sm <sup>r</sup>                  | (2)                          |
| <i>lafR</i> ::Km                      | USDA 110 derivative, <i>lafR</i> mutant by Km insertion                                             | This study                   |
| $\Delta flbT_L$                       | USDA 110 derivative, <i>flbT_L</i> deletion mutant                                                  | This study                   |
| <i>lafR</i> ::Km pFAJ                 | <i>lafR</i> ::Km mutant carrying the pFAJ1708 empty vector                                          | This study                   |
| <i>lafR</i> ::Km pFAJ:: <i>lafR</i>   | <i>lafR</i> ::Km mutant carrying the pFAJ:: <i>lafR</i> plasmid                                     | This study                   |
| <i>lafR</i> ::Km pFAJ:: <i>flbT_L</i> | <i>lafR</i> ::Km mutant carrying the pFAJ:: <i>flbT_L</i> plasmid                                   | This study                   |
| <i>lafRD50A</i>                       | USDA 110 with the D50A point mutation in <i>lafR</i>                                                | This study                   |
| <i>lafRD50G</i>                       | USDA 110 with the D50G point mutation in <i>lafR</i>                                                | This study                   |
| <i>lafRD50E</i>                       | USDA 110 with the D50E point mutation in <i>lafR</i>                                                | This study                   |
| $\Delta flbT_L$ pFAJ                  | $\Delta flbT_L$ mutant carrying the pFAJ1708 empty vector                                           | This study                   |
| $\Delta flbT_L$ pFAJ:: <i>flbT_L</i>  | $\Delta flbT_L$ mutant carrying the pFAJ:: <i>flbT_L</i> plasmid                                    | This study                   |
| USDA 110 pFAJ                         | USDA 110 carrying the pFAJ1708 vector                                                               | This study                   |
| USDA 110 pFAJ:: <i>lafR</i>           | USDA 110 carrying the pFAJ:: <i>lafR</i> plasmid                                                    | This study                   |
| USDA 110 pFAJ:: <i>flbT_L</i>         | USDA 110 carrying the pFAJ:: <i>flbT_L</i> plasmid                                                  | This study                   |
| USDA 110 pCB:: <i>PlafA1</i>          | USDA 110 carrying the pCB:: <i>PlafA1</i> plasmid                                                   | This study                   |
| USDA 110 pCB:: <i>PlafA2</i>          | USDA 110 carrying the pCB:: <i>PlafA2</i> plasmid                                                   | This study                   |
| <i>E. meliloti</i>                    |                                                                                                     |                              |
| Rm2011                                | Wild-type, Sm <sup>r</sup>                                                                          | (3)                          |
| Rm2011mTn5STM.1.08.H02                | Rm2011 <i>rem</i> ::mTn5 insertion                                                                  | (4)                          |
| <i>E. coli</i>                        |                                                                                                     |                              |
| DH5 $\alpha$                          | F- <i>endA1 supE44 thi-1-recA1 gyrA96 relA1 deoRD(lacZYA-argF)U169</i>                              | Bethesda Research Laboratory |
| S17-1                                 | <i>E. coli</i> 294 Thi RP4-2-Tc::Mu-Km::Tn7 integrated into the chromosome                          | Bethesda Research Laboratory |
| Plasmids                              |                                                                                                     |                              |
| pG18mob2                              | <i>lacZ<math>\alpha</math></i> Gm <sup>r</sup>                                                      | (5)                          |
| pK18mobsacB                           | <i>lacZ<math>\alpha</math></i> Km <sup>r</sup> <i>sacB</i>                                          | (6)                          |
| pFAJ1708                              | broad-host-range expression vector containing <i>pnptII</i> promoter, Tc <sup>r</sup>               | (7)                          |
| pUC4K                                 | Plasmid with <i>nptI</i> gene (source for Km-resistance cassette) Ap <sup>r</sup> , Km <sup>r</sup> | (8)                          |
| pCB303                                | Promoterless $\beta$ -galactosidase vector, replicative in <i>Bradyrhizobium</i>                    | (9)                          |
| pG:: <i>lafR</i>                      | pG18mob2 carrying the internal fragment of the <i>lafR</i> gene                                     | This study                   |
| pG:: <i>lafR</i> ::Km                 | pG:: <i>lafR</i> carrying the Km cassette in the middle of the <i>lafR</i> gene                     | This study                   |
| pG:: <i>lafRD50A</i>                  | pG:: <i>lafR</i> carrying the point mutation D50A                                                   | This study                   |
| pG:: <i>lafRD50G</i>                  | pG:: <i>lafR</i> carrying the point mutation D50G                                                   | This study                   |
| pG:: <i>lafRD50E</i>                  | pG:: <i>lafR</i> carrying the point mutation D50E                                                   | This study                   |
| pKsacB:: <i>lafRD50A</i>              | pK18mobsacB vector carrying the fragment subcloned from pG:: <i>lafR</i> :D50A                      | This study                   |
| pKsacB:: <i>lafRD50G</i>              | pK18mobsacB vector carrying the fragment subcloned from pG:: <i>lafR</i> :D50G                      | This study                   |
| pKsacB:: <i>lafRD50E</i>              | pK18mobsacB vector carrying the fragment subcloned from pG:: <i>lafR</i> :D50E                      | This study                   |
| pKsacB:: <i>flbT_L</i>                | pK18mobsacB carrying the <i>flbT_L</i> deletion construct                                           | This study                   |
| pFAJ:: <i>lafR</i>                    | pFAJ1708 carrying the complete coding sequence of <i>B. diazoefficiens lafR</i>                     | This study                   |
| pFAJ:: <i>flbT_L</i>                  | pFAJ1708 carrying the complete coding sequence of <i>B. diazoefficiens flbT_L</i>                   | This study                   |
| pCB:: <i>PlafA1</i>                   | pCB303 carrying the 657-bp fragment corresponding to the putative promoter region of <i>lafA1</i>   | This study                   |
| pCB:: <i>PlafA2</i>                   | pCB303 carrying the 591-bp fragment corresponding to the putative promoter region of <i>lafA2</i>   | This study                   |

**Table S2.** Primers used in this study.

| Primer name (ref.) | Sequence                                 | Use in the study                                                                                               |
|--------------------|------------------------------------------|----------------------------------------------------------------------------------------------------------------|
| LafR_Fw            | CGAAACAGGGGCGAAAGAC                      | Construction of the <i>lafR</i> insertional mutant                                                             |
| LafR_Rv            | <u>AAAAAGCTT</u> GGTTGAGGAGGATGCCGAC     |                                                                                                                |
| LafRextFw          | <u>AAAATCTAGAC</u> CACGCAGTAAGCGTTCAGT   | Check the position of the crossing-over event in the <i>lafR</i> mutant and construction of pFAJ:: <i>lafR</i> |
| LafRextRv          | <u>AAAAGGTACC</u> GAGGCCGTTGTCGTTTTTCG   |                                                                                                                |
| 6846D50A_Fw        | TCGCCGCCTTCTCCTC                         | Amplification of the <i>lafR</i> fragment with the desired point mutation                                      |
| 6846D50A_Rv        | GAGGAGGAAGGCGCGCA                        |                                                                                                                |
| 6846D50G_Fw        | TCGCCGCCTTCTCCTC                         |                                                                                                                |
| 6846D50G_Rv        | GAGGAGGAAGGCGCGCA                        |                                                                                                                |
| 6846D50E_Fw        | TCGAAGCCTTCTCCTC                         |                                                                                                                |
| 6846D50E_Rv        | GAGGAGGAAGGCTTCGA                        |                                                                                                                |
| FibTUP_Fw          | <u>AAAAGAATT</u> CCGACGGTCTCGGGCGTGCTT   | Construction of the <i>fibT<sub>L</sub></i> deletion mutant                                                    |
| FibTUP_Rv          | GCCGTCGACGGATCCGAGGCACTCGGCATCGTGACCACCG |                                                                                                                |
| FibTDW_Fw          | TGCCTCGATCCGTCGACGGCCATTGCCGGCCCTATCCGAC |                                                                                                                |
| FibTDW_Rv          | <u>AAAAAAGCTT</u> TTGCGCTGTTCCGGCTCGCTG  |                                                                                                                |
| FibTextFw          | <u>AAAATTCTAGA</u> ATCATCTCGATCGGCTTGTG  | Construction of pFAJ:: <i>fibT<sub>L</sub></i>                                                                 |
| FibTextRv          | <u>AAAAGGTACC</u> CCTGGTCGAACTGGACGACTT  |                                                                                                                |
| promA1_Fw          | <u>AATCTAGAG</u> TGTCATGGCGGTCGAGTTC     | Construction of pCB:: <i>PlafA1</i>                                                                            |
| promA1_Rv          | <u>AAACTGCAG</u> ATCCGTTCCGCGAGTTTCATG   |                                                                                                                |
| promA2_Fw          | <u>AATCTAGAT</u> TTCGACAGCAGTTGGTGAGG    | Construction of pCB:: <i>PlafA2</i>                                                                            |
| promA2_Rv          | <u>AAACTGCAG</u> GGTTACATCGCGCAGGTCA     |                                                                                                                |
| LafR_Fw            | CGAAACAGGGGCGAAAGAC                      | qRT-PCR studies                                                                                                |
| q6846int_Rv        | GGTCCGATTCCTCGCAGA                       |                                                                                                                |
| q6848_Fw           | GCAACCGTCTCCTCCTCG                       |                                                                                                                |
| q6848_Rv           | TGACGGTTGAAGCGGCAT                       |                                                                                                                |
| q6854_Fw           | AATGGGATGTCGGTGGCG                       |                                                                                                                |
| q6854_Rv           | CCGTTACTTCGAGGCGCT                       |                                                                                                                |
| q6861_Fw           | AGGCCGCCGTCATATTCG                       |                                                                                                                |
| q6861_Rv           | ATGGTGCCTGGACGGATG                       |                                                                                                                |
| q6864-2_Fw         | CGAGACCCAGATACGGCG                       |                                                                                                                |
| q6864-2_Rv         | CGACAAGGTGACGGTGCT                       |                                                                                                                |
| LafA2_Fw (10)      | CCTCACCAACTCGTCTGCAA                     |                                                                                                                |
| LafA2_Rv (10)      | CCGTGTTCCAGAGCGGTGTATT                   |                                                                                                                |
| LafA1_Fw (10)      | GGTTACATCGCGCAGGTCA                      |                                                                                                                |
| LafA2_Rv (10)      | GGGTGGACTCCTGGTTCATGT                    |                                                                                                                |
| q6867_Fw           | GAACAGCATCTTGAACGGCA                     |                                                                                                                |
| q6867_Rv           | CCGTTCTCTGATCGACAT                       |                                                                                                                |
| q6868_Fw           | CGGCGAGATTGGTCACGA                       |                                                                                                                |
| q6868_Rv           | CATCTGTTGCAGCCGCC                        |                                                                                                                |
| q6878_Fw           | GTCCTCGTGCAGCGTCTT                       |                                                                                                                |
| q6878_Rv           | ATGAGCCAGTTGCCGTCC                       |                                                                                                                |

|               |                        |
|---------------|------------------------|
| q6881_Fw      | TCAGCAGCACCGCATCAA     |
| q6881_Rv      | TGGCTCGTCTCGAAAGCA     |
| phaR_Fw       | GGTCAAGGATGGCGAAGA     |
| phaR_Rv       | GATCTGCTTGCGGAACTT     |
| relA_Fw       | TACAATCCCAACACCAACGA   |
| relA_Rv       | CAATCGCCAGCAACAATTT    |
| <hr/>         |                        |
| 6849_Fw       | ATCGGCGGCGGATGATTT     |
| 6849ext_Rv    | CCAGGTTCTGTGCGGAGAG    |
| int6849.5FW   | CTCTCCGCACGAACCTGG     |
| int6849.5RV   | GTCGGATGGTCTCGCTCG     |
| 6850ext_Fw    | CGAGCGAGACCATCCGAC     |
| 6850_Rv       | ATCGCCAGCCCGTTCATC     |
| q6858Fw2      | ATTGCCGAACCGCTCTT      |
| q6858Rv2      | TCGCGAACGTCAACACCA     |
| q6859Fw       | TCCCTCGCGCTGTTTCAG     |
| q6859Rv       | AGTTCACCTCGGTGCGGG     |
| int58-59_Fw   | TTGTTGGATTGCGCGGACA    |
| int58-59_Rv   | GCCGAAAACGACCTGACAAC   |
| 6860_Fw       | CGACTGTGACGAGGGCTG     |
| 6860_Rv       | GACTCGATCCGCGAGCTG     |
| int60-61_Fw   | ACGTCCCGCGCATATTGA     |
| int60-61_Rv   | GCTCGCGAACTCGAACT      |
| fliCIFw (10)  | CCTCACCAACTCGTCTGCAA   |
| fliCIRv       | CCGTGTTCCAGAGCGGTGTATT |
| fliCIIFw (10) | GGTTACATCGCGCAGGTCA    |
| fliCIIRv      | GGGTGGACTCCTGGTTCATGT  |
| int65-66 Fw   | GACAGGTTGGGTCTTCACA    |
| int65-66 Rv   | GGCTTGTTGGCTCTGTGACTC  |
| 6876          | GCATTCCGTCGAGCACCT     |
| 6876          | TCGACCATCGCCACCAAC     |
| 6877          | CCTGCTTGTGCTCGTCCT     |
| 6877          | CGTCTCGGCGATCTGCAT     |
| int76-77      | GCTTGCGACGATGCGAGT     |
| int76-77      | AGTCGAAGCAGACGACCC     |
| 6879_Fw       | CGTGAGCGAGACCCGAA      |
| 6879_Rv       | CCTGATGAAGCTCGGGCG     |
| q6881_Fw      | TCAGCAGCACCGCATCAA     |
| q6881_Rv      | TGGCTCGTCTCGAAAGCA     |
| int79-80_Fw   | ACGTCTCGGTCTCTCCG      |
| int79-80_Rv   | AAGATCGACCAGGCCAC      |

---

RT-PCR to determine the operon structure of the regulon

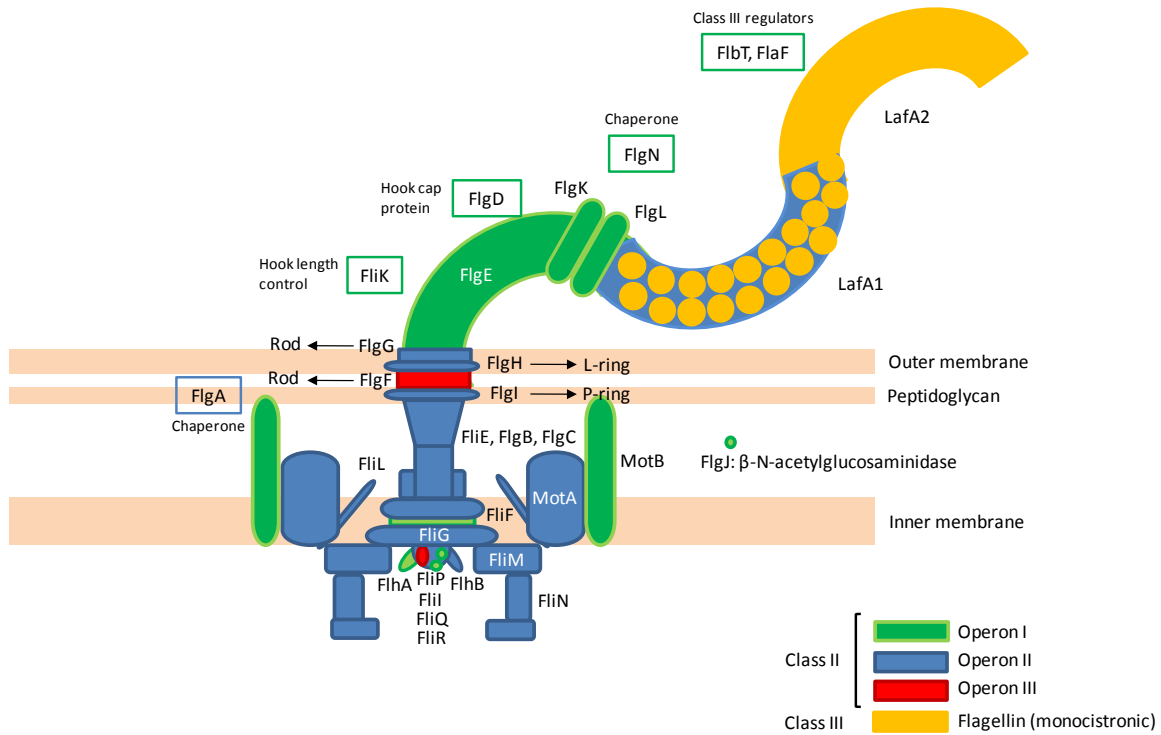

**Fig. S1.** General structure of the lateral flagellum of *B. diazoefficiens* depicting the gene products that we could identify, with a color code indicating which operon encodes each one. For the flagellins, the *lafA1* gene seemed to be expressed as part of Operon II, but also as an independent monocistronic unit.



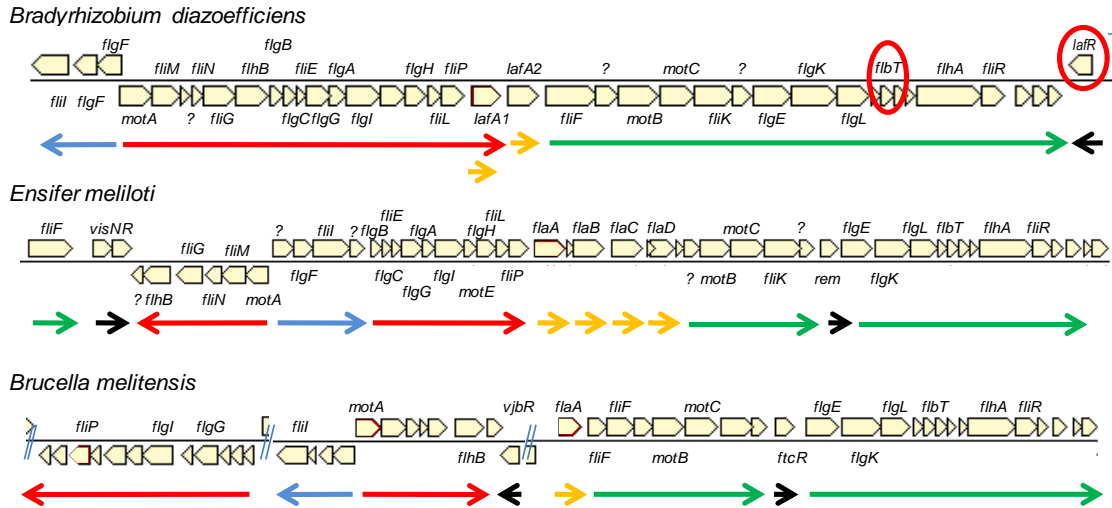

**Fig. S3.** Comparison of the flagellar-gene clusters of *B. diazoefficiens* (lateral flagellum), *E. meliloti*, and *B. melitensis*. The operon organizations are indicated (in colors) below each cluster. Encircled (in red) are *lafR* and *flbT<sub>L</sub>*, which loci were studied in this work. Note that the orientation of the gene cluster of *B. diazoefficiens* has been rotated with respect to the orientation given in Rhizobase in order to visualize the synteny of the three clusters.

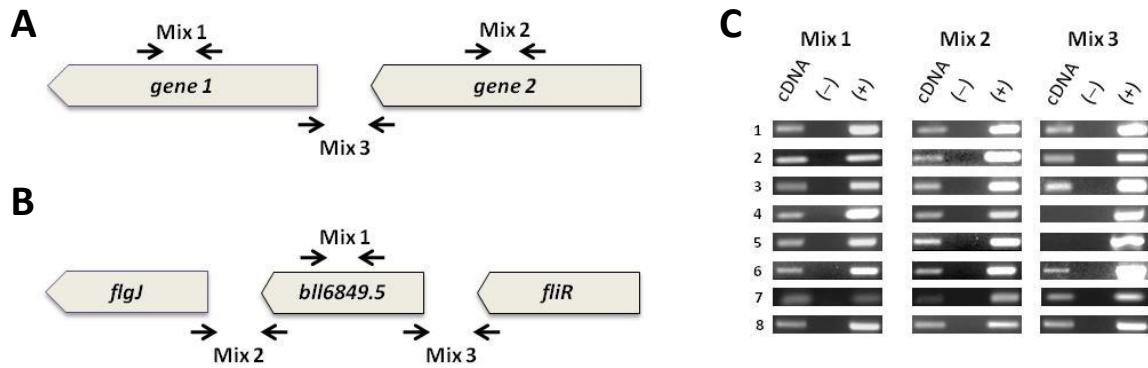

**Fig. S4.** Strategy to find whether two contiguous genes are cotranscribed in the same polycistronic mRNA.

- A.** Scheme of the general strategy where RT-PCR amplifications are done from internal gene sequences (mix 1 and 2) and intergenic sequences (mix 3).
- B.** The particular strategy followed with *flgJ*, *bll6849.5*, and *fliR*.
- C.** RT-PCR results obtained with the strategy outlined in panels **A** and **B** for the regions numbered 1-8 in Figure 2A (cDNA). Amplification from the genomic DNA was the positive control (+), and amplification without template was the negative control (-).

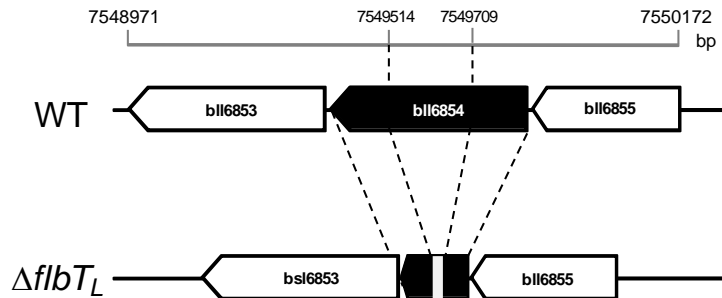

**Fig. S5.** Scheme of the deletion produced in *bll6854* (*flbT<sub>L</sub>*) without alteration of the reading frame



**A**

|       |     |                                                                                     |     |
|-------|-----|-------------------------------------------------------------------------------------|-----|
| LafA1 | 1   | ACGGCGGGTTGGACCC--CACCCACAT-----CAGTCCAAAGGCATGATGCCGCCCCCTCC                       | 53  |
| LafA2 | 1   | CGACAGGTTGGGTCTTCACACGCATTTCCGCGGCCCAAAGGCATGATGCCGCCCCCTGTC                        | 59  |
| LafA1 | 54  | GTACCGGTGAAAGCCCGGTATGTC <sup>CCCCCTCGTGA</sup> AAATGTAACGCGTACAT-AAAGGGACA         | 112 |
| LafA2 | 60  | GTACCGGTGCAAGTCCGGTATGTC <sup>CCCC-----A</sup> ACTC-AATTCAATCGCA <sup>AGGGACA</sup> | 113 |
| LafA1 | 113 | TTCCGAATG---TCAAGCCTGCTTACGACTCGACCCGCATGACCGCGCTCCAGACCCTG                         | 169 |
| LafA2 | 114 | T-CAAA <u>ATG</u> GGTTCCTAGCCTCCTCACCACTCGTCTGCAATGACCGCGCTCGAGACC                  | 169 |

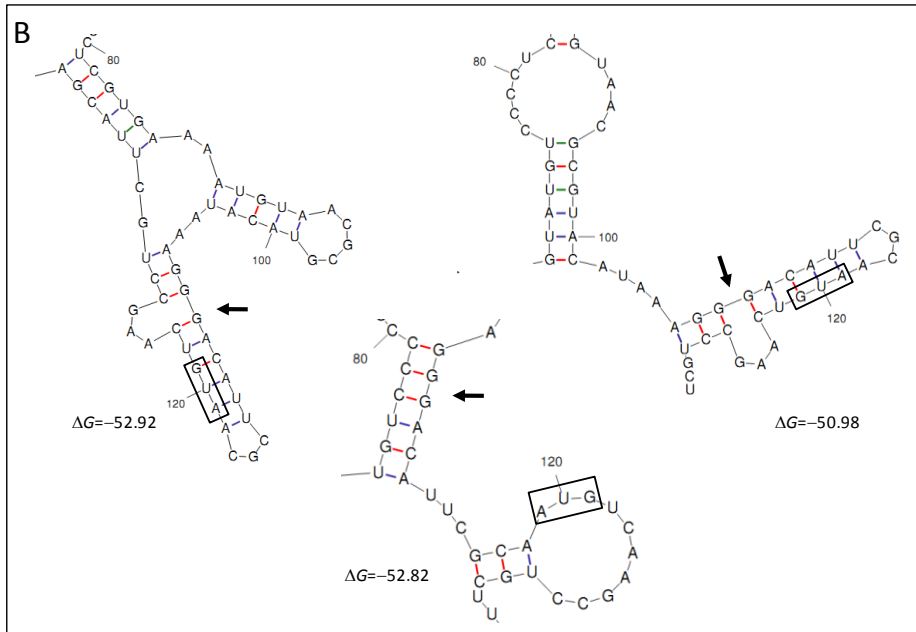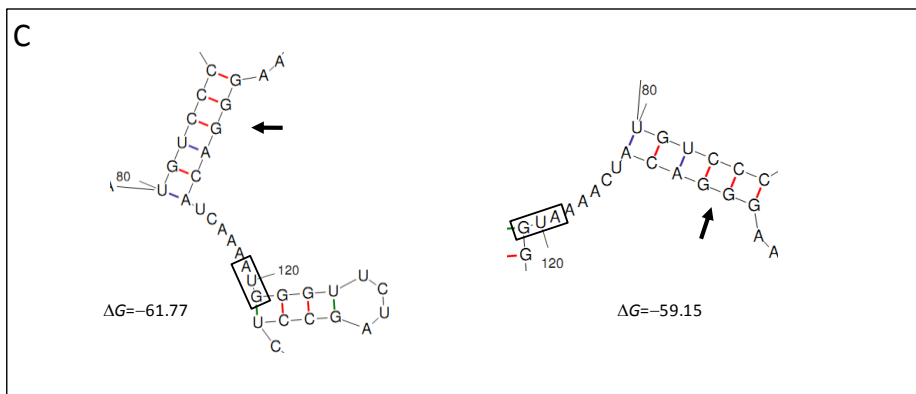

**Fig. S6.** Structure of the 5'UTRs of *lafA1* and *lafA2*.

**A.** BLAST nucleotide sequence alignment of the 5'UTR regions considering the transcription start site at 118 nt upstream of the ATG initiation codon (ref. 34 in the main article) and including the first 17 codons (ref. 39 in the main article). Squared is the gap found at the 3' end of a sequence complementary to the ribosome-binding site (RBS). Underlined are the RBS and the ATG initiation codon.

**B, C.** Predicted secondary structures of the region containing the RBS (arrow) and ATG (squared) sequences in three representative structures of *lafA1* (**B**) and two of *lafA2* (**C**).

**D, E.** Predicted stable secondary structures of the 5'UTRs of *lafA1* (**D**) and *lafA2* (**E**).

D

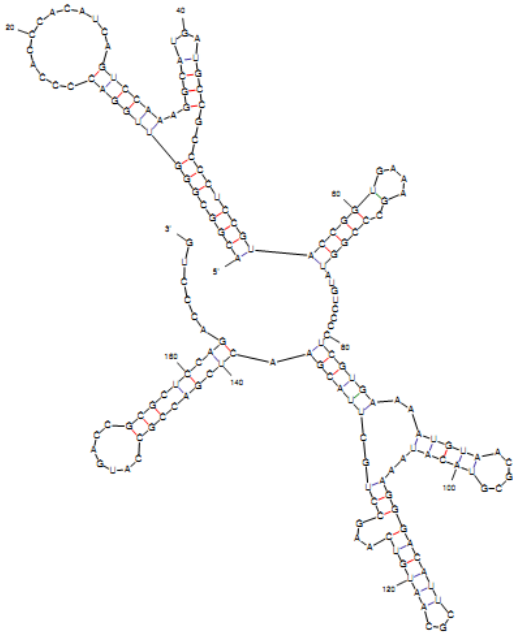

$\Delta G = -52.92$

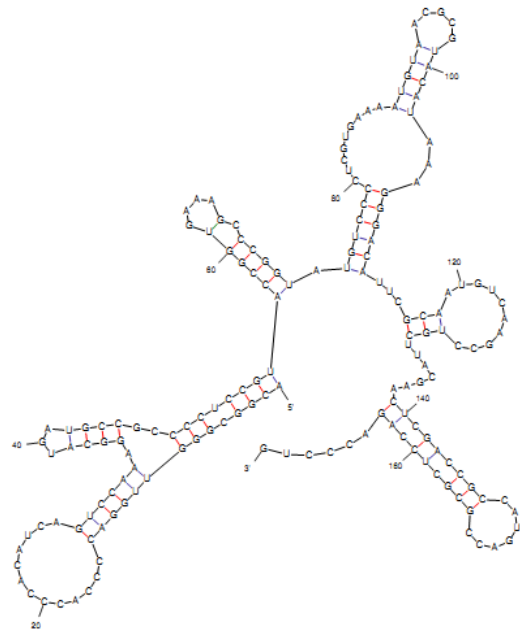

$\Delta G = -52.82$

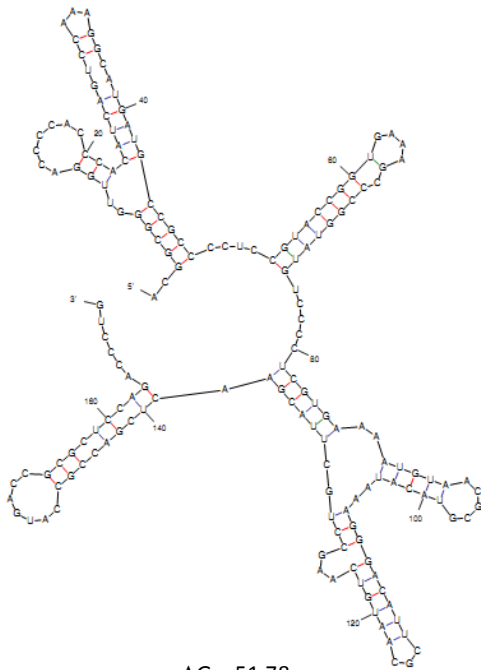

$\Delta G = -51.78$

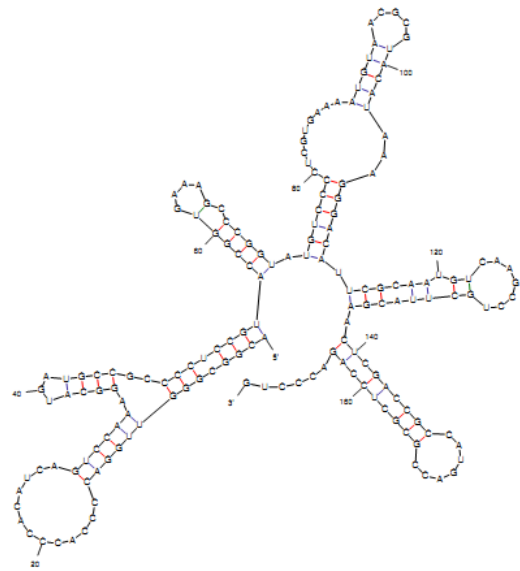

$\Delta G = -51.11$

Fig. S6. (continued)

D

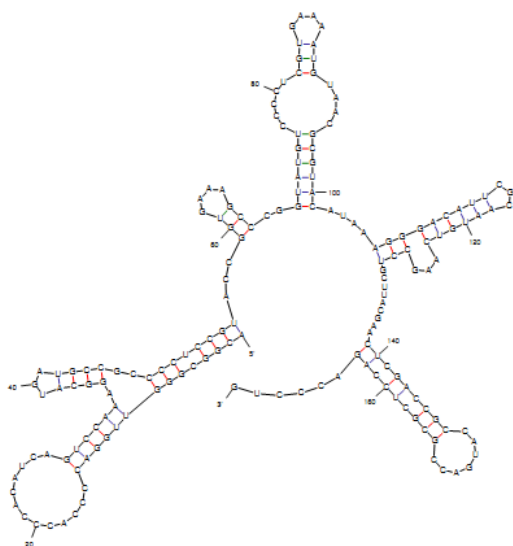

$\Delta G = -50.98$

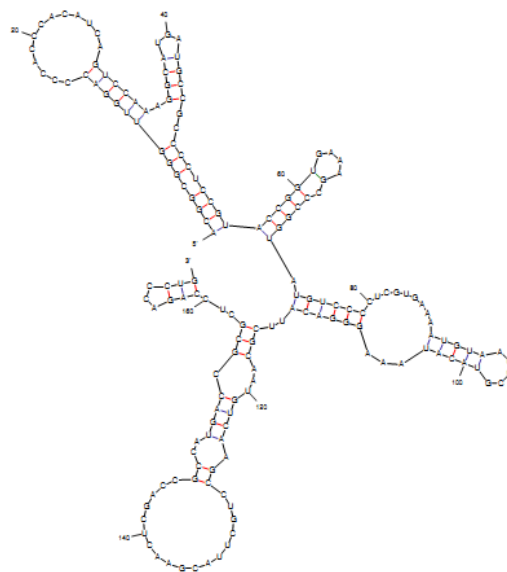

$\Delta G = -50.55$

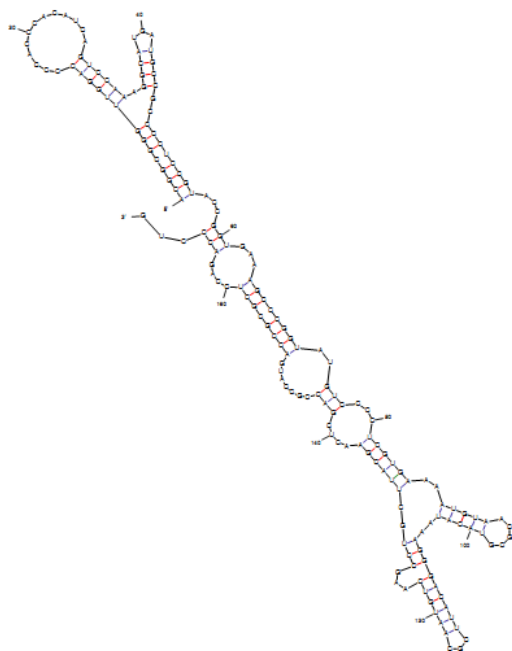

$\Delta G = -50.40$

**Fig. S6.** (continued)

E

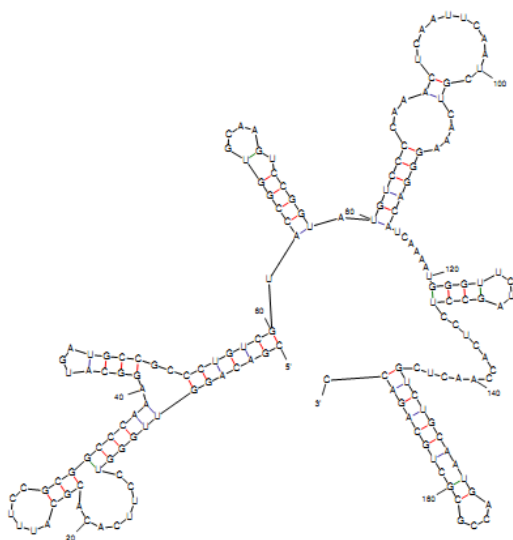

$\Delta G = -61.77$

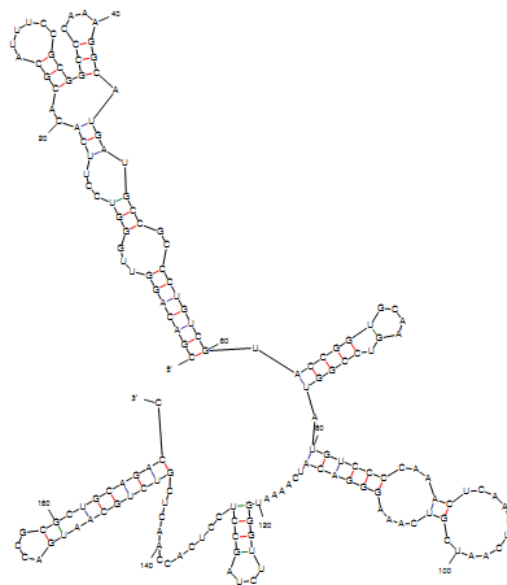

$\Delta G = -59.15$

Fig. S6. (continued)

## References

1. López-García S, Vázquez TEE, Favelukes G, Lodeiro AR. 2002. Rhizobial position as a main determinant in the problem of competition for nodulation in soybean. *Environ Microbiol* **4**:216-224.
2. Althabegoiti MJ, López-García SL, Piccinetti C, Mongiardini EJ, Pérez-Giménez J, Quelas JI, Peticari A, Lodeiro AR. 2008. Strain selection for improvement of *Bradyrhizobium japonicum* competitiveness for nodulation of soybean. *FEMS Microbiol Lett* **282**: 115-123.
3. Casse F, Boucher C, Julliot J, Michel M, Dénarié J. 1979. Identification and characterization of large plasmids in *Rhizobium meliloti* using agarose gel electrophoresis. *Microbiology* **113**: 229-242.
4. Pobigaylo N, Wetter D, Szymczak S, Schiller U, Kurtz S, Meyer F, Nattkemper TW, Becker A. 2006. Construction of a large sequence signature-tagged miniTn5 transposon library and its application to mutagenesis of *Sinorhizobium meliloti*. *Appl Environ Microbiol* **72**:4329-4337.
5. Kirchner O, Tauch A. 2003. Tools for genetic engineering in the amino acid-producing bacterium *Corynebacterium glutamicum*. *J Biotechnol* **104**: 287-299.
6. Schäfer A, Tauch A, Jäger W, Kalinowski J, Thierbach G, Pühler A. 1994. Small mobilizable multi-purpose cloning vectors derived from the *Escherichia coli* plasmids pK18 and pK19: selection of defined deletions in the chromosome of *Corynebacterium glutamicum*. *Gene* **145**: 69-73.
7. Dombrecht B, Vanderleyden J, Michiels J. 2001. Stable RK2-derived cloning vectors for the analysis of gene expression and gene function in gram-negative bacteria. *Mol Plant-Microbe Interact.* **14**: 426-430.

8. Vieira J, Messing J.1982. The pUC plasmids, an M13mp7-derived system for insertion mutagenesis and sequencing with synthetic universal primers. *Gene* **19**: 259-68.
9. Schneider K, Beck CF. 1987. New expression vectors for identifying and testing signal structures for initiation and termination of transcription. *Methods Enzymol* **153**: 452-461.
10. Althabegoiti MJ, Covelli JM, Pérez-Giménez J, Quelas JI, Mongiardini EJ, López MF, López-García SL, Lodeiro AR.2011. Analysis of the role of the two flagella of *Bradyrhizobium japonicum* in competition for nodulation of soybean. *FEMS Microbiol Lett* **319**: 133-139.
